# Supplementary material
Source: HighWire-hosted journal article supplement (https://erj.ersjournals.com/content/55/3/2000352)
Supplement: inline-supplementary-material-1 [file inline-supplementary-material-1.pdf]

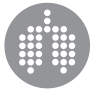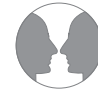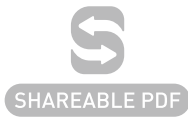

# More awareness is needed for severe acute respiratory syndrome coronavirus 2019 transmission through exhaled air during non-invasive respiratory support: experience from China

Lili Guan<sup>1,5</sup>, Luqian Zhou<sup>1,5,6</sup>, Jinnong Zhang<sup>2,5</sup>, Wei Peng<sup>3,5</sup> and Rongchang Chen<sup>1,4,6</sup>

**Affiliations:** <sup>1</sup>State Key Laboratory of Respiratory Disease, National Clinical Research Center for Respiratory Disease, Guangzhou Institute of Respiratory Health, The First Affiliated Hospital of Guangzhou Medical University, Guangzhou, China. <sup>2</sup>Dept of Emergency Medicine, Union Hospital, Tongji Medical College, Huazhong University of Science and Technology, Wuhan, China. <sup>3</sup>Division of ICU and Respiratory Service, Dept of Internal Medicine, Salt Lake Regional Medical Center, Heart and Lung Institute of Utah, Salt Lake City, UT, USA. <sup>4</sup>Dept of Respiratory and Critical Care Medicine, First Affiliated Hospital of Southern University of Science and Technology, Second Clinical Medical College of Jinan University, Shenzhen People's Hospital, Shenzhen Institute of Respiratory Diseases, Shenzhen, China. <sup>5</sup>These authors contributed equally to this work as first authors. <sup>6</sup>These authors contributed equally to this work as senior authors.

**Correspondence:** Rongchang Chen, Dept of Respiratory and Critical Care Medicine, First Affiliated Hospital of Southern University of Science and Technology, Second Clinical Medical College of Jinan University, Shenzhen People's Hospital, Shenzhen Institute of Respiratory Diseases, 1017 Dong Men Road, Shenzhen 518020, China. E-mail: chenrc@vip.163.com

 @ERSpublications

**Non-invasive respiratory support plays an essential role in the treatment of COVID-19. More awareness is needed of viral transmission through exhaled air.** <http://bit.ly/39kNrrF>

**Cite this article as:** Guan L, Zhou L, Zhang J, *et al.* More awareness is needed for severe acute respiratory syndrome coronavirus 2019 transmission through exhaled air during non-invasive respiratory support: experience from China. *Eur Respir J* 2020; 55: 2000352 [<https://doi.org/10.1183/13993003.00352-2020>].

This single-page version can be shared freely online.

*To the Editor:*

As of 17 February, 2020, China has 70635 confirmed cases of coronavirus disease 2019 (COVID-19), including 1772 deaths [1]. Human-to-human spread of the virus *via* respiratory droplets is currently considered to be the main route of transmission. However, exhaled air dispersion during non-invasive respiratory support may increase the risk of coronavirus transmission, and requires more attention from medical personnel and patients.
